# Supplementary material for: Estrogen-related receptors alpha, beta and gamma expression and function is associated with transcriptional repressor EZH2 in breast carcinoma
Source: PubMed Central journal article supplement (PMC6019302; doi:10.1186/s12885-018-4586-0), 2018-06-26
Supplement: 12885_2018_4586_MOESM1_ESM.pdf [file 12885_2018_4586_MOESM1_ESM.pdf]

| Primary breast tumor details |                                    |       |
|------------------------------|------------------------------------|-------|
| S.No.                        | Breast cancer type                 | Grade |
| 1                            | Invasive breast Carcinoma          | 2     |
| 2                            | Invasive Breast carcinoma          | 3     |
| 3                            | Invasive Breast Carcinoma          | 1     |
| 4                            | Invasive Breast Carcinoma          | 2     |
| 5                            | Invasive Breast carcinoma          | 3     |
| 6                            | Ductal Carcinoma In Situ           | 3     |
| 7                            | Invasive Breast Carcinoma          | 1     |
| 8                            | Invasive lobular carcinoma         | 3     |
| 9                            | Invasive Breast carcinoma          | 2     |
| 10                           | Invasive Breast carcinoma          | 3     |
| 11                           | Invasive Breast carcinoma          | 3     |
| 12                           | Invasive Breast carcinoma          | 3     |
| 13                           | Ductal Carcinoma In Situ           | 2     |
| 14                           | Residual Invasive Breast Carcinoma | 2     |
| 15                           | Invasive Breast carcinoma          | 2     |
| 16                           | Invasive Breast Carcinoma          | 2     |
| 17                           | Residual Invasive Breast Carcinoma | 3     |
| 18                           | Mucinous Carcinoma                 | 1     |
| 19                           | Invasive Breast carcinoma          | 2     |

**Table S1. Tissue microarray patient sample details.** Nineteen breast carcinoma patient samples were included in the the study.

| <b>Antibody/Reagent/Kit</b>                                                              | <b>Catalog no.</b>        | <b>Company</b>                |
|------------------------------------------------------------------------------------------|---------------------------|-------------------------------|
| $\alpha$ -tubulin antibody                                                               | T5168                     | Sigma Aldrich, USA            |
| anti-EZH2 antibody                                                                       | D2C9-5246                 | Cell Signaling Technology     |
| anti-Rabbit IgG (whole molecule)–Peroxidase antibody produced in goat secondary antibody | A0545                     | Sigma Aldrich, USA            |
| anti-mouse HRP conjugated secondary antibody                                             | A3682-1ML                 | Sigma Aldrich, USA            |
| Anti-ERR $\alpha$ antibody                                                               | sc-65715                  | Santacruz Biotechnology       |
| Anti-ERR $\beta$ antibody                                                                | sc-376449                 | Santacruz Biotechnology       |
| Anti-ERR $\gamma$ antibody                                                               | sc-393969                 | Santacruz Biotechnology       |
| SYBER Green                                                                              | RT-SY2X-03+NRWOU          | Eurogentech                   |
| SuperScript <sup>®</sup> First-Strand Synthesis System for RT-PCR                        | 11904018                  | Invitrogen, Carlsbad, CA      |
| Dnase I Kit                                                                              | AMPD1-1KT                 | Sigma Aldrich, USA            |
| Lipofectamine 3000                                                                       |                           | Invitrogen                    |
| PVDF membrane                                                                            | 88518, 0.45 $\mu$ m,      | Thermo scientific             |
| Skimmed milk                                                                             | RM1254-500G               | Himedia                       |
| ECL-HRP for X-ray Film Kit                                                               | K-12045-D50               |                               |
| Trizol                                                                                   | T9424                     | Sigma Aldrich, USA            |
| MCF-7 cell line                                                                          | ATCC_HTB-22 <sup>™</sup>  | NCCS Pune, Maharashtra, India |
| T47D cell line                                                                           | ATCC_HTB-133 <sup>™</sup> | NCCS Pune, Maharashtra, India |
| MDA-MB-231 cell line                                                                     | ATCC_HTB-26 <sup>™</sup>  | NCCS Pune, Maharashtra, India |

**Table S2.** Table provides the details of reagents/cell lines used in the study. All reagents used in the study were obtained from authentic companies.

| <b>Primer name</b> | <b>Sequence (5'-&gt;3')</b> |
|--------------------|-----------------------------|
| ESRRA SITE 1 F     | GTCCCAAATATTGCACGAGATA      |
| ESRRA SITE 1 R     | ATCAAACCCCAACCCTCTTTT       |
| ESRRA SITE 2 F     | GAAACCCCGTCTCTACTAAAA       |
| ESRRA SITE 2 R     | TATCTCGTGCAATATTTGGGAC      |
| ESRRA SITE 3 F     | GAAACCCCGTCTCTACTAAAA       |
| ESRRA SITE 3 R     | TATCTCGTGCAATATTTGGGAC      |
| ESRRA SITE 4 F     | GACTAAGTCTTGCTAATGAGGA      |
| ESRRA SITE 4 R     | GACTATTTTGAGAGTGCTTGC       |
| ESRRA SITE 5 F     | TAGGTGCTGTAGTGTTATATGC      |
| ESRRA SITE 5 R     | GTATTTCAATCACCAGGTCATC      |
| ESRRB SITE 1 F     | CTTTGGTTTGGTAGAAGGATAGTAG   |
| ESRRB SITE 1 R     | CTATGTGTTAGAAGCAAAGGG       |
| ESRRB SITE 2&3 F   | TTGTGGAGCATTTCCTTACA        |
| ESRRB SITE 2&3 R   | AAAGGGTTGGGGATCTAAAC        |
| ESRRB SITE 4&5 F   | GTTTCTTTCTAGGGCATAAACC      |
| ESRRB SITE 4&5 R   | GTTCGATTTTCTCTCTCTTGC       |
| ESRRB SITE 6 F     | AGTAGAAATTCAGTGACCACAG      |
| ESRRB SITE 6 R     | GGACAAAAGCTATTAGATGCAG      |
| ESRRB SITE 7 F     | AAGAGAGGGAAGATACTACCAA      |
| ESRRB SITE 7 R     | TCAGAGATCTAGACAAACACAG      |
| ESRRB SITE 8 F     | CCAAAGTCACAAGAACTGAAC       |
| ESRRB SITE 8 R     | AGAGAAAGAATACCATACCTCG      |
| ESRRB SITE 9 F     | CTAGCACTGAATGTAACAAGAC      |
| ESRRB SITE 9 R     | CCTGAATATTGTCTCATGGATC      |
| 5'Ex1Ezh2          | AGAAGGGACCAGTTTGTGG         |
| 3'Ex1Ezh2          | TTCATCAGCTCGTCTGAACC        |
| GAPDH RT FW        | AAGATCATCAGCAATGCCTC        |
| GAPDH RT RV        | CTCTTCCTCTTGTGCTCTTG        |
| 5'Ex6ERRβF         | AAGCCATTGACCAAGATTGT        |
| 3'EX7ERRβR         | GGTCACAGAGAGTGGTCAGG        |
| 5'Ex7ERRαF         | CTCAGGGGGTAGGAGAGCAC        |
| 3'EX7ERRαR         | CTCCCTGGCCAAACCCAAAA        |
| 5'Ex2ERRγF         | CAGAATGTCAAACAAAGATCGACAC   |
| 3'EX3ERRγR         | GGTTGAACTGTAGCTCCCACTG      |

**Table S3.** Table provides the sequence of primers used in the study.

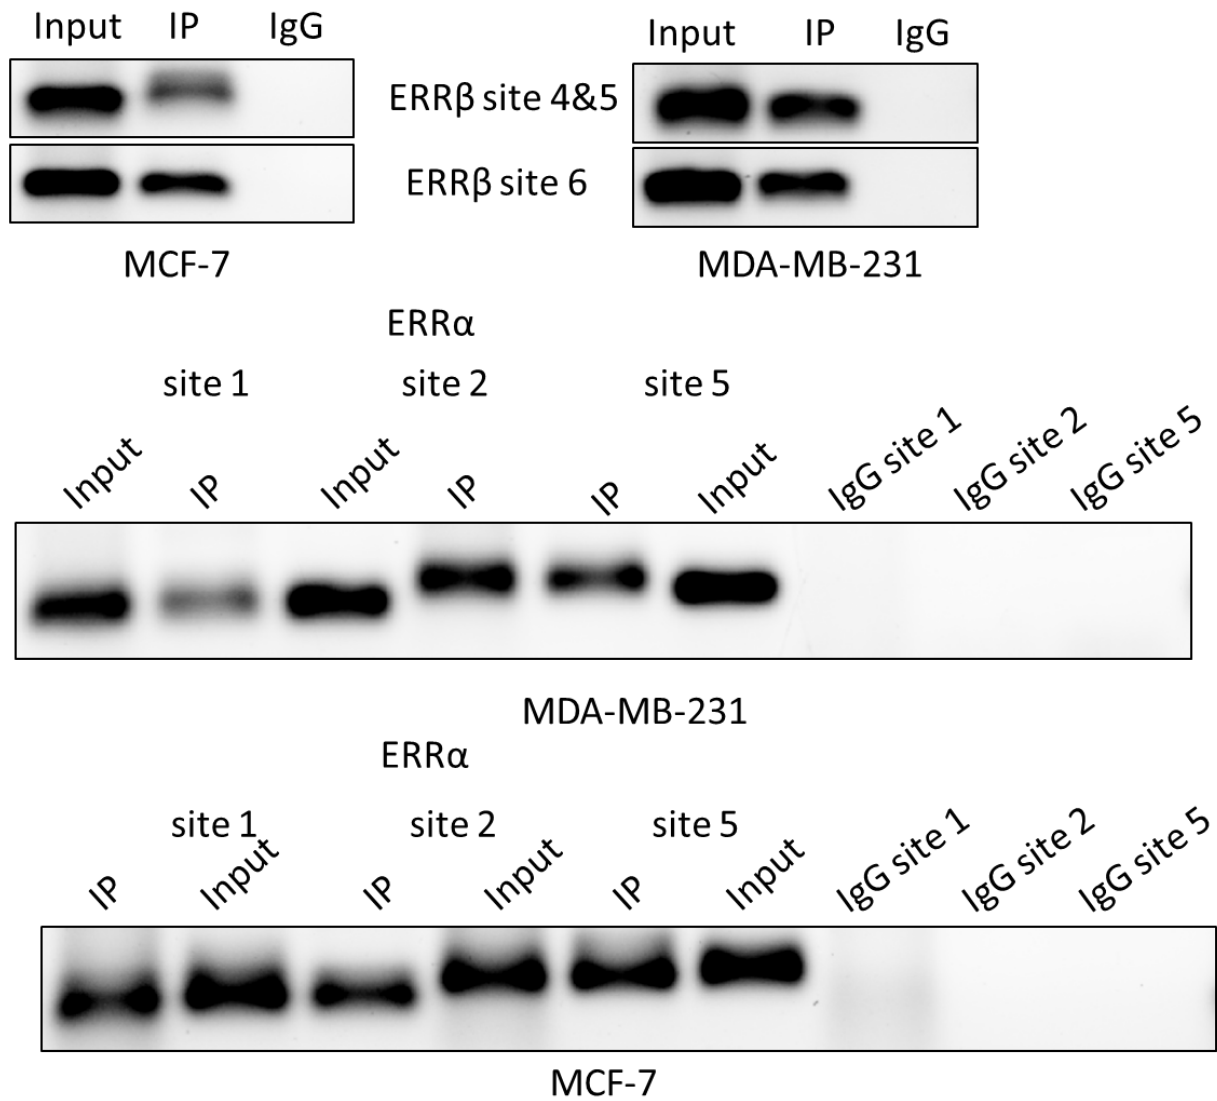

Figure S1: Agarose gel picture of CHIP-qPCR product for positive binding sites of EZH2 on ERR $\alpha$  and ERR $\beta$

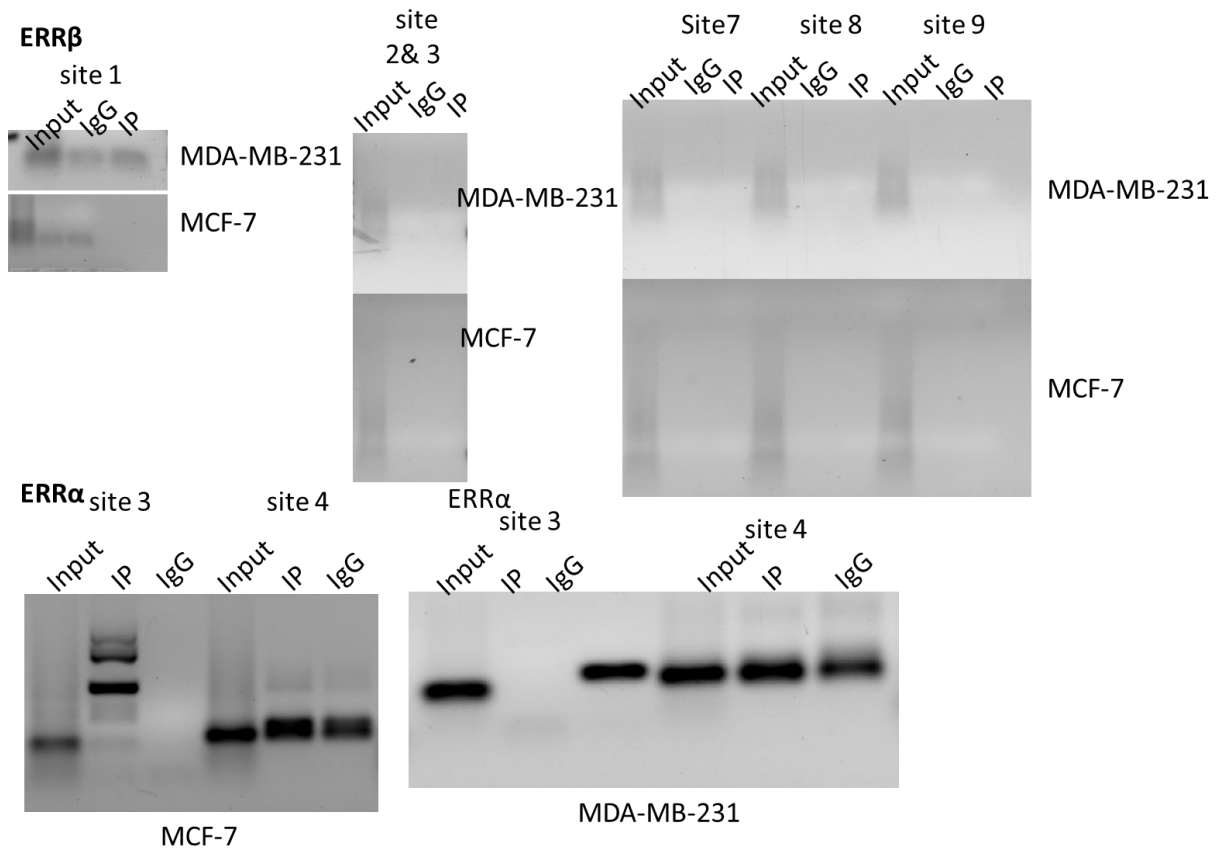

**Figure S2: Agarose gel picture of CHIP-qPCR product for negative binding sites of EZH2 on ERRα and ERRβ**

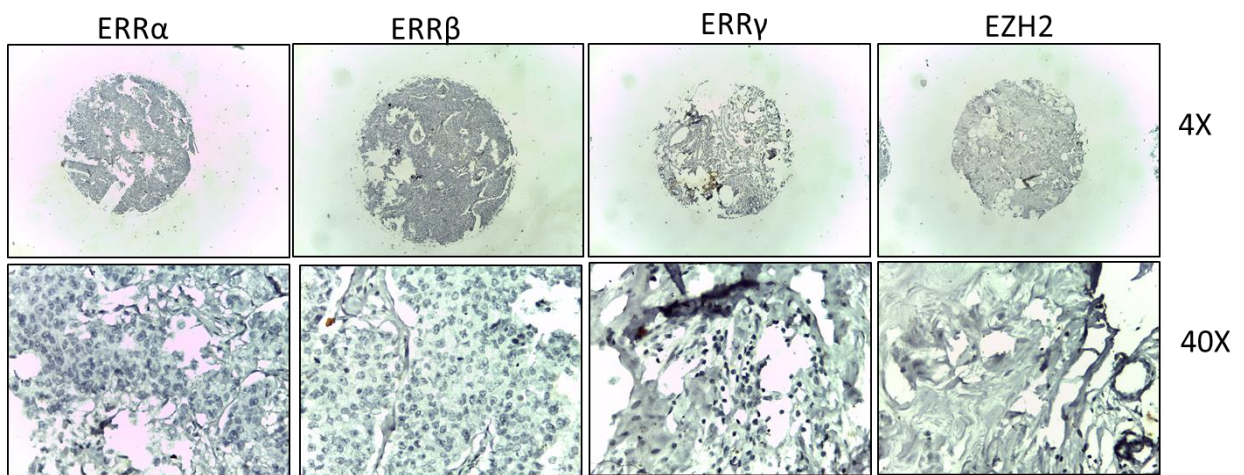

**Figure S3: Immunohistochemistry negative control cases for primary antibodies ERRα, ERRβ, ERRγ and EZH2.**
